# Supplementary material for: Collision with Seamount Triggers Breakup of Antarctic Iceberg
Source: Copernicus journal article supplement (doi:10.5194/egusphere-2024-2790), 2024-11-11
Supplement: Supplementary file 1 [file egusphere-2024-2790-supplement.zip]

**Table S1.** Remote sensing data used for outline extraction of A68a, the area and parameter of A68a on different observation dates.

| Iceberg | Date     | CenterLat<br>(degree) | Centerlon<br>(degree) | Area<br>(km <sup>2</sup> ) | Parameter<br>(km) | Error of<br>Area (km <sup>2</sup> ) | Image                                                                |
|---------|----------|-----------------------|-----------------------|----------------------------|-------------------|-------------------------------------|----------------------------------------------------------------------|
| A68b    | 20170718 | -67.255562            | -60.817377            | 85.0                       | 38.6              | 1.0                                 | s1a-ew-grd-hh-20170718t235039-20170718t235139-017532-01d523-001.tiff |
| A68a    | 20170722 | -67.961743            | -60.876499            | 5648.7                     | 413.4             | 10.3                                | s1a-ew-grd-hh-20170722t001458-20170722t001558-017576-01d670-001.tiff |
| A68b    | 20170722 | -67.270836            | -60.832699            | 84.7                       | 38.5              | 1.0                                 | s1a-ew-grd-hh-20170722t001458-20170722t001558-017576-01d670-001.tiff |
| A68a    | 20180119 | -67.771615            | -60.460849            | 5613.8                     | 430.2             | 10.8                                | s1a-ew-grd-hh-20180119t235845-20180119t235945-020230-02285d-001.tiff |
| A68a    | 20180718 | -67.598382            | -59.613729            | 5493.5                     | 401.6             | 10.0                                | s1a-ew-grd-hh-20180718t235851-20180718t235951-022855-027a77-001.tiff |
| A68a    | 20190116 | -66.658290            | -58.954639            | 5475.7                     | 424.9             | 10.6                                | s1b-ew-grd-hh-20190116t075242-20190116t075342-014516-01b09b-001.tiff |
| A68a    | 20190716 | -65.556068            | -58.340262            | 5383.3                     | 392.2             | 9.8                                 | s1b-ew-grd-hh-20190716t233400-20190716t233505-017165-0204a8-001.tiff |
| A68a    | 20190820 | -65.162119            | -57.928811            | 5323.1                     | 394.0             | 9.8                                 | s1b-ew-grd-hh-20190820t075249-20190820t075349-017666-0213c3-001.tiff |
| A68a    | 20190920 | -65.010718            | -57.645070            | 5321.9                     | 393.0             | 9.8                                 | s1b-ew-grd-hh-20190920t074429-20190920t074529-018118-0221dd-001.tiff |
| A68a    | 20191014 | -64.906512            | -57.478979            | 5313.8                     | 393.7             | 9.8                                 | s1b-ew-grd-hh-20191014t074430-20191014t074530-018468-022cbd-001.tiff |
| A68a    | 20191119 | -64.770480            | -56.459051            | 5301.4                     | 393.0             | 9.8                                 | s1a-ew-grd-hh-20191119t233446-20191119t233550-029986-036c4a-001.tiff |
| A68a    | 20191215 | -64.472854            | -55.602035            | 5294.3                     | 401.4             | 10.0                                | s1a-ew-grd-hh-20191215t231834-20191215t231938-030365-037956-001.tiff |
| A68a    | 20200111 | -63.955031            | -53.383135            | 5142.8                     | 391.5             | 9.8                                 | s1b-ew-grd-hh-20200111t075148-20200111t075248-019766-0255f6-001.tiff |
| A68a    | 20200227 | -62.646448            | -53.209014            | 5068.7                     | 391.1             | 9.8                                 | s1a-ew-grd-hh-20200227t230322-20200227t230422-031444-039ec9-001.tiff |

|      |          |            |            |        |       |     |                                                                      |
|------|----------|------------|------------|--------|-------|-----|----------------------------------------------------------------------|
| A68a | 20200317 | -61.801540 | -52.150074 | 5031.6 | 392.2 | 9.8 | s1a-ew-grd-hh-20200317t225506-20200317t225606-031721-03a873-001.tiff |
| A68a | 20200415 | -60.800285 | -50.207698 | 4931.3 | 391.3 | 9.8 | s1a-ew-grd-hh-20200415t230323-20200415t230423-032144-03b755-001.tiff |
| A68a | 20200422 | -60.616417 | -50.280739 | 4749.1 | 384.5 | 9.6 | s1a-ew-grd-hh-20200422t225507-20200422t225607-032246-03baed-001.tiff |
| A68c | 20200422 | -60.392719 | -51.157896 | 162.1  | 54.5  | 1.4 | s1a-ew-grd-hh-20200422t225507-20200422t225607-032246-03baed-001.tiff |
| A68a | 20200524 | -60.292840 | -49.496361 | 4670.9 | 390.2 | 9.8 | s1b-ew-grd-hh-20200524t223830-20200524t223930-021729-0293e2-001.tiff |
| A68a | 20200611 | -59.928756 | -48.890569 | 4618.1 | 376.2 | 9.4 | s1a-ew-grd-hh-20200611t223913-20200611t224013-032975-03d1d0-001.tiff |
| A68a | 20200710 | -59.501127 | -49.435560 | 4554.9 | 381.2 | 9.5 | s1a-ew-grd-hh-20200710t224720-20200710t224820-033398-03deaa-001.tiff |
| A68a | 20200816 | -58.861869 | -49.794604 | 4472.5 | 383.9 | 9.6 | s1b-ew-grd-hh-20200816t223835-20200816t223935-022954-02b92b-001.tiff |
| A68a | 20200908 | -59.288183 | -49.688496 | 4435.5 | 381.6 | 9.5 | s1a-ew-grd-hh-20200908t224723-20200908t224823-034273-03fbbb-001.tiff |
| A68a | 20201009 | -57.533720 | -47.885448 | 4324.3 | 368.3 | 9.2 | s1a-ew-grd-hh-20201009t223919-20201009t224019-034725-040ba5-001.tiff |
| A68a | 20201121 | -56.155275 | -41.242298 | 4099.4 | 382.1 | 9.6 | s1a-ew-grd-hh-20201121t072605-20201121t072705-035343-042119-001.tiff |
| A68a | 20201209 | -55.024682 | -39.296301 | 3925.4 | 384.9 | 9.6 | s1b-ew-grd-hh-20201209t072431-20201209t072535-024622-02ed88-001.tiff |
| A68a | 20201213 | -55.165336 | -38.029978 | 3840.9 | 358.6 | 9.0 | s1b-ew-grd-hh-20201213t215842-20201213t215942-024689-02efad-001.tiff |
| A68a | 20201215 | -55.303313 | -37.721103 | 3825.1 | 358.8 | 9.0 | s1b-ew-grd-hh-20201225t065306-20201225t065406-024855-02f50b-001.tiff |
| A68a | 20201221 | -56.246809 | -36.884176 | 3582.5 | 334.1 | 8.4 | s1a-ew-grd-hh-20201221t214224-20201221t214328-035789-043075-001.tiff |
| A68d | 20201221 | -55.322073 | -36.936190 | 147.5  | 50.5  | 1.3 | s1a-ew-grd-hh-20201221t214328-20201221t214425-035789-043075-001.tiff |
| A68a | 20201222 | -56.179889 | -36.883439 | 2605.7 | 227.0 | 5.7 | s1a-ew-grd-hh-20201222t071734-20201222t071834-035795-0430ac-001.tiff |
| A68d | 20201222 | -55.320450 | -36.932963 | 146.4  | 50.7  | 1.3 | s1a-ew-grd-hh-20201222t071734-20201222t071834-035795-0430ac-001.tiff |

|      |          |            |            |        |       |      |                                                                                                                                              |
|------|----------|------------|------------|--------|-------|------|----------------------------------------------------------------------------------------------------------------------------------------------|
| A68e | 20201222 | -56.736723 | -36.570533 | 655.9  | 147.0 | 3.7  | s1a-ew-grd-hh-20201222t071734-20201222t071834-035795-0430ac-001.tiff                                                                         |
| A68f | 20201222 | -56.517146 | -36.853663 | 230.1  | 70.9  | 1.8  | s1a-ew-grd-hh-20201222t071734-20201222t071834-035795-0430ac-001.tiff                                                                         |
| A68a | 20201224 | -56.552848 | -36.574164 | 2600.9 | 229.4 | 5.7  | s1a-ew-grd-hh-20201224t070105-20201224t070205-035824-043192-001.tiff                                                                         |
| A68d | 20201224 | -55.482242 | -36.867484 | 138.7  | 49.7  | 1.2  | s1a-ew-grd-hh-20201224t070105-20201224t070205-035824-043192-001.tiff                                                                         |
| A68a | 20210128 | -56.264788 | -35.751754 | 1560.5 | 189.4 | 4.7  | s1b-ew-grd-hh-20210128t070913-20210128t071001-025351-0304eb-001.tiff<br>s1b-ew-grd-hh-20210128t070809-20210128t070913-025351-0304eb-001.tiff |
| A68g | 20210128 | -56.477715 | -35.798319 | 742.6  | 135.6 | 3.4  | s1b-ew-grd-hh-20210128t070913-20210128t071001-025351-0304eb-001.tiff<br>s1b-ew-grd-hh-20210128t070809-20210128t070913-025351-0304eb-001.tiff |
| A68a | 20210212 | -56.710656 | -34.292655 | 752.5  | 138.9 | 34.7 | MOD02QKM.A2021043.1145.061.2021043190932.hdf                                                                                                 |
| A68a | 20210312 | -56.117930 | -32.025916 | 364.5  | 96.2  | 24.1 | MOD02QKM.A2021071.1205.061.2021072012606.hdf                                                                                                 |
| A68a | 20210416 | -52.858790 | -33.529354 | 19.8   | 18.8  | 4.7  | MOD02QKM.A2021106.1235.061.2021107031355.hdf                                                                                                 |

**Table S2. Information of other MODIS data used in this research.**

| Index | Date     | Image                                        |
|-------|----------|----------------------------------------------|
| 1     | 20201216 | MOD02QKM.A2020351.1245.061.2020358182102.hdf |
| 2     | 20201217 | MOD02QKM.A2020352.1150.061.2020352190753.hdf |
| 3     | 20210520 | MOD02QKM.A2021140.1225.061.2021141014525.hdf |
| 4     | 20210520 | MYD02QKM.A2021140.1630.061.2021141153238.hdf |

**Table S3. Cryosat-2 Data used to detect freeboard of A68a and the mean sea surface and freeboard of A68a extracted from the five different orbits of Cryosat-2.**

| Orbit | Cycle | Date-Time             | $S_i$ (m)        | $F_i$ (m) |
|-------|-------|-----------------------|------------------|-----------|
| 56101 | 18    | 2020-11-07 T 07:59:11 | $15.96 \pm 0.15$ | 33.85     |
| 56224 | 18    | 2020-11-15 T 19:26:16 | $16.19 \pm 0.31$ | 32.82     |
| 56405 | 18    | 2020-11-28 T 06:49:30 | $15.72 \pm 0.48$ | 31.06     |
| 56434 | 18    | 2020-11-30 T 06:47:36 | $15.22 \pm 0.40$ | 32.01     |
| 56528 | 18    | 2020-12-06 T 18:16:36 | $15.36 \pm 0.45$ | 32.94     |

**Table S4. Coordinates used for georeferencing A68a from December 15, 2020 to MODIS observation on December 16, 2020.**

| GCP on Sentinel-1 December 15 |             | GCP on MODIS December 16 |             |
|-------------------------------|-------------|--------------------------|-------------|
| X (m)                         | Y (m)       | X (m)                    | Y (m)       |
| -2371855.517                  | 3031098.056 | -2338939.512             | 3039672.94  |
| -2295409.767                  | 3007681.891 | -2274043.685             | 2993018.26  |
| -2289619.996                  | 2971292.464 | -2280078.7               | 2956734.917 |
| -2276209.657                  | 2973496.644 | -2266724.571             | 2954497.459 |
| -2337791.245                  | 3048172.077 | -2301180.962             | 3044969.823 |
| -2364447.927                  | 3053186.194 | -2324741.544             | 3058250.966 |
| -2379161.617                  | 3051742.46  | -2339204.075             | 3061583.376 |
| -2354203.831                  | 3000344.178 | -2331990.634             | 3004904.861 |
| -2340469.756                  | 2988926.281 | -2322634.73              | 2989692.543 |
| -2314994.357                  | 3027473.842 | -2286206.027             | 3018054.559 |
| -2362608.915                  | 3011091.483 | -2336520.341             | 3017777.605 |
| -2384809.729                  | 3045348.69  | -2346578.906             | 3057330.117 |
| -2383139.308                  | 3038473.189 | -2347196.407             | 3050283.184 |
| -2324998.719                  | 3037355.806 | -2292479.98              | 3030573.942 |
| -2316525.152                  | 2989610.178 | -2299771.317             | 2982682.996 |
| -2308363.465                  | 2993818.755 | -2290698.479             | 2984055.238 |
| -2274894.899                  | 2962617.513 | -2268909.126             | 2943782.583 |

**Table S5. Coordinates used for georeferencing A68a from December 21, 2020 to MODIS observation on December 16, 2020.**

| GCP on Sentinel-1 December 21 |             | GCP on MODIS December 16 |             |
|-------------------------------|-------------|--------------------------|-------------|
| X (m)                         | Y (m)       | X (m)                    | Y (m)       |
| -2274128.788                  | 2996151.716 | -2343693.248             | 3048613.812 |
| -2258158.143                  | 3010187.593 | -2324744.979             | 3058259.041 |
| -2209073.253                  | 2945956.276 | -2293089.29              | 2983875.537 |
| -2181040.342                  | 2916964.066 | -2273106.381             | 2948845.897 |
| -2229596.996                  | 3000348.487 | -2299508.683             | 3041655.533 |
| -2175690.821                  | 2912924.731 | -2268923.37              | 2943607.956 |
| -2230975.868                  | 2948887.275 | -2313584.511             | 2992137.571 |
| -2211308.622                  | 2980867.837 | -2286612.275             | 3018253.76  |
| -2260001.42                   | 2968256.598 | -2336915.39              | 3018064.859 |
| -2179684.497                  | 2937649.664 | -2266671.232             | 2968555.222 |
| -2193592.808                  | 2928726.119 | -2282356.509             | 2963347.824 |

**Table S6. Coordinates used for georeferencing A68d from December 21, 2020 to MODIS observation on December 16, 2020.**

| GCP on Sentinel-1 December 21 |             | GCP on MODIS December 16 |             |
|-------------------------------|-------------|--------------------------|-------------|
| X (m)                         | Y (m)       | X (m)                    | Y (m)       |
| -2297169.69                   | 3048973.353 | -2333402.43              | 3063739.142 |
| -2295511.063                  | 3052562.868 | -2330034.673             | 3062155.65  |
| -2292071.295                  | 3040282.426 | -2343680.898             | 3059030.918 |
| -2289401.276                  | 3037965.285 | -2346592.054             | 3056606.604 |
| -2294640.716                  | 3043345.039 | -2339796.965             | 3061418.126 |
| -2288457.391                  | 3051258.359 | -2332876.28              | 3055395.413 |

**Table S7. Drifting velocity of iceberg A68a during December 13-15 and December 15-16, 2020. The centroid of A68a on December 13 and 15, 2020 was extracted from Sentinel-1 images. Centroid on December 16, 2020 was extracted from MODIS Aqua image.**

| Centroid<br>_Start<br>(m) | Centroid<br>_End<br>(m) | Date_Start<br>(YYYYMM<br>MDD<br>HH:MM:S<br>S) | Date_End<br>(YYYYMM<br>MDD<br>HH:MM:S<br>S) | V <sub>x</sub><br>(cm/s) | V <sub>y</sub><br>(cm/s) | V (cm/s) | Angular<br>Velocity<br>(°/d) |
|---------------------------|-------------------------|-----------------------------------------------|---------------------------------------------|--------------------------|--------------------------|----------|------------------------------|
| (-2357843,<br>3014273)    | (-2332560,<br>3015491)  | 20201213<br>21:58:42                          | 20201215<br>07:25:34                        | 21.0±0.1                 | 1.0±0.1                  | 21.0±0.1 | 17.2±0.7<br>clockwise        |
| (-2332560,<br>3015491)    | (-2306705,<br>3012311)  | 20201215<br>07:25:34                          | 20201216<br>12:45:00                        | 24.5±1.9                 | -3.0±1.9                 | 24.7±1.9 | 15.1±1.6<br>clockwise        |
